# Supplementary material for: Skp1 in lung cancer: clinical significance and therapeutic efficacy of its small molecule inhibitors
Source: PubMed Central journal article supplement (PMC4741501; doi:10.18632/oncotarget.5547), 2015-10-12
Supplement: oncotarget-06-34953-s001.pdf [file oncotarget-06-34953-s001.pdf]

## SUPPLEMENTARY FIGURES AND TABLES

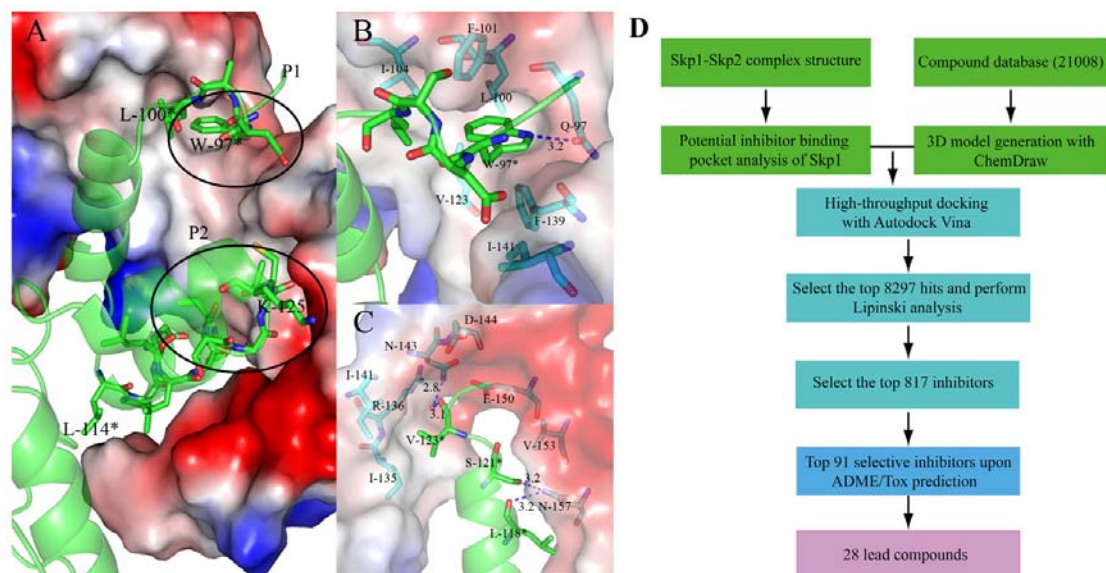

**Supplementary Figure S1: Methods for identification of Skp1-targeting agents.** A–C. Potential binding pockets (P1 and P2) on Skp1 (PDB code: 2AST). Location of site P1 and P2 on Skp1, the residues of Skp2 inserted into these pockets were shown as sticks. Skp1 and skp2 are shown as surface and cartoon respectively (A) Interactions between Skp2 and the residues at site P1 (B) and P2 (C) of Skp1, respectively. The key residues are shown as sticks and the H-bonds are labeled. The residues from Skp2 are labeled by star. **D.** The high-throughput virtual screening workflow for lead identification.

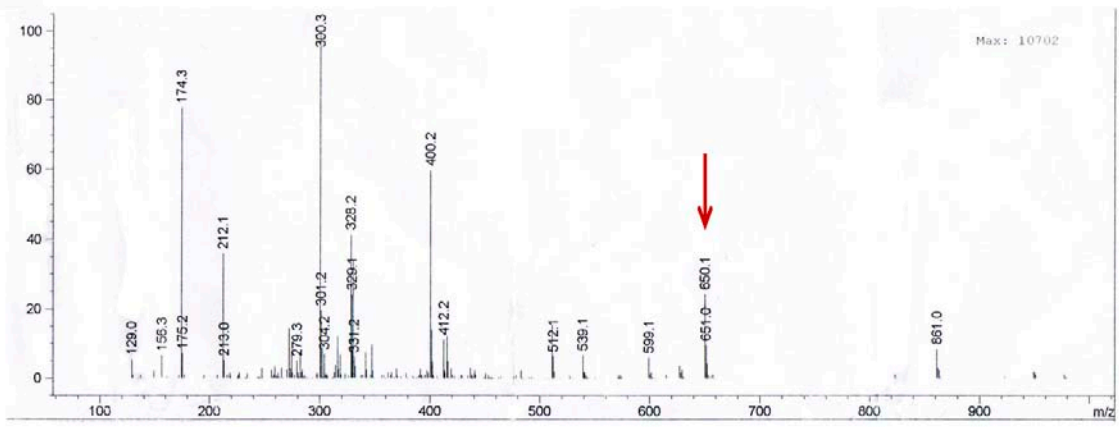

Supplementary Figure S2: Mass spectrum analysis of Biotin-6-OAP.

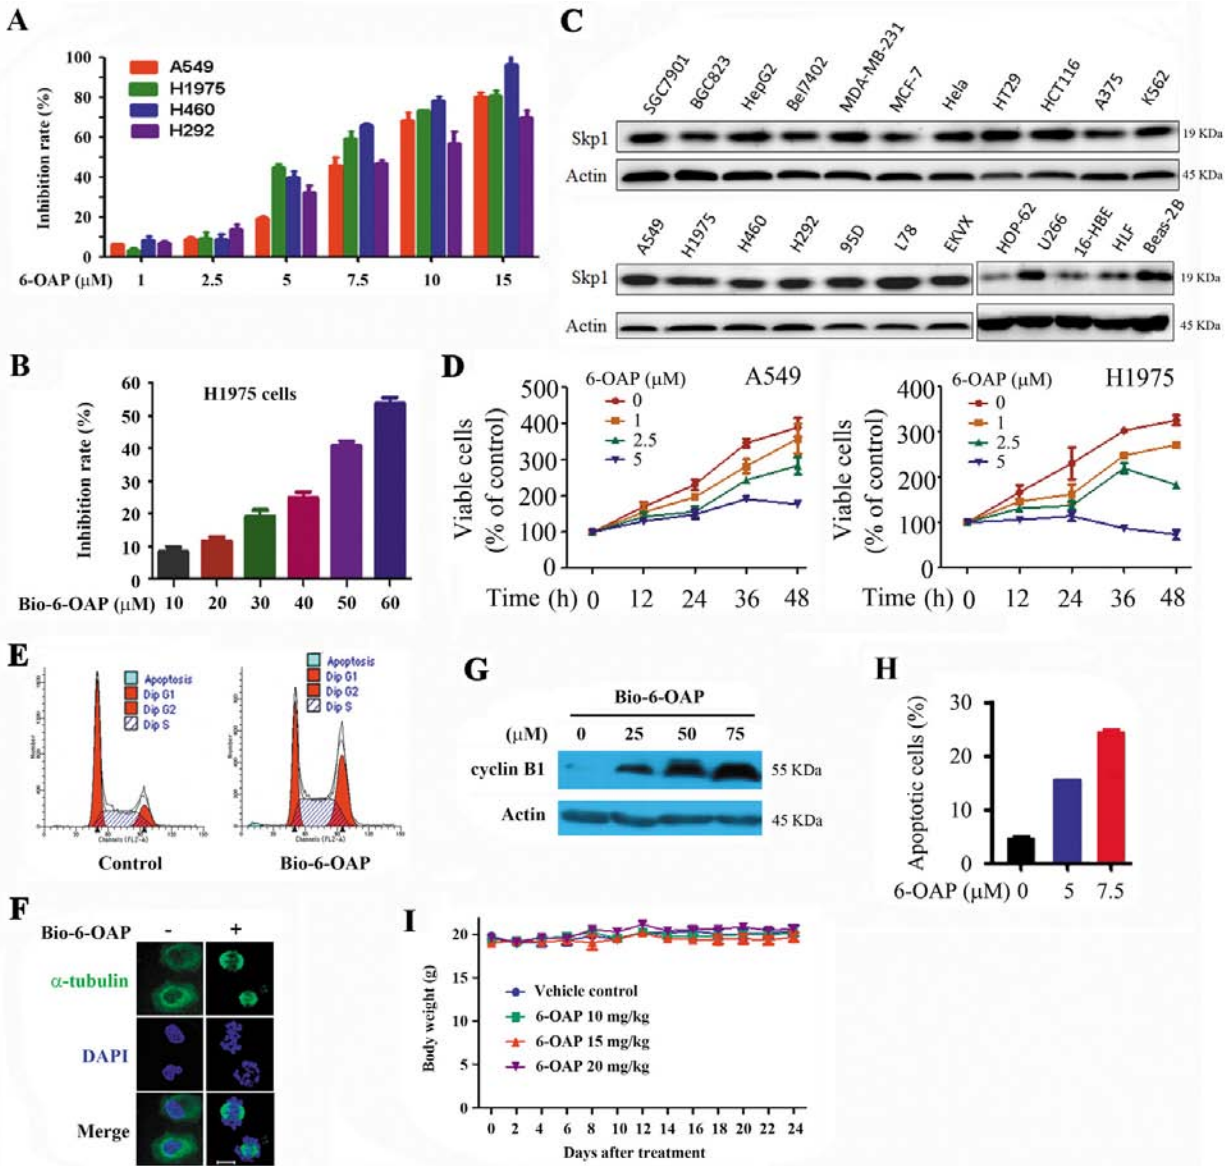

**Supplementary Figure S3: Effects of Bio-6-OAP and 6-OAP on lung cancer cells.** A, B. MTT assays of H1975 cells upon 6-OAP (A) and Bio-6-OAP (B) treatment at indicated concentrations for 48 h. C. Western blot analysis of indicated cell lines using indicated antibodies. D. The cells were treated with or without 6-OAP, and analyzed by trypan blue exclusion assay. E. H1975 cells were treated with 6-OAP for 24 h, fixed with 70% ethanol, and analyzed by propidium iodide staining and flow cytometry. F, G. H1975 cells were treated with 7.5 μM Bio-6-OAP for 12 h, and assayed by immunofluorescence labeling with anti-α-tubulin antibody and DAPI (F), or lysed for Western blot assays. H. A549 cells were treated with 6-OAP for 24 hours, and assessed by Annexin V/flow cytometry. I. Treatment with 6-OAP did not significantly affect body weight of the nude mice.

Supplementary Table S1: Effects of the Skp1-targeting compounds on cancerous and normal lung epithelial cell lines

| No. | Compounds   | Chemical structure                                                                    | BAE (kcal/mol) | GI50 ( $\mu$ M) |        |       |        |       |         |       |  |
|-----|-------------|---------------------------------------------------------------------------------------|----------------|-----------------|--------|-------|--------|-------|---------|-------|--|
|     |             |                                                                                       |                | A549            | H1975  | H460  | BGC823 | MCF7  | BEL7402 | 16HBE |  |
| 1   | E766-0019   | 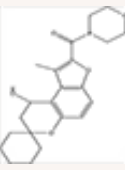   | -7.8           | >100            | >100   |       | >100   |       |         |       |  |
| 2   | 8610-0668   |    | -7.6           | >100            | >100   |       | >100   |       |         |       |  |
| 3   | Liriodenine |    | -7.6           | 3.004           | 8.115  | 3.714 | 2.776  | 3.853 | 2.031   | 8.81  |  |
| 4   | E754-0530   |    | -7.6           | >100            | >100   |       | >100   |       |         |       |  |
| 5   | F059-1240   |   | -7.6           | 11.3            | >100   |       | 14.3   |       |         |       |  |
| 6   | Evodiamine  |  | -7.5           | 1.325           | 14.219 | 3.886 | 0.451  | 0.506 | 0.196   | >20   |  |
| 7   | J005-0626   |  | -7.5           | >100            | 96.3   |       | 22.4   |       |         |       |  |

(Continued)

| No. | Compounds           | Chemical structure                                                                    | BAE (kcal/mol) | GI50 ( $\mu$ M) |       |      |        |       |         |       |  |
|-----|---------------------|---------------------------------------------------------------------------------------|----------------|-----------------|-------|------|--------|-------|---------|-------|--|
|     |                     |                                                                                       |                | A549            | H1975 | H460 | BGC823 | MCF7  | BEL7402 | 16HBE |  |
| 8   | 6-OAP               | 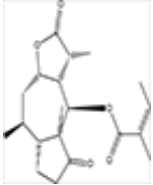   | -7.4           | 2.863           | 2.76  | 4.18 | 3.502  | 2.919 | 2.381   | 8.76  |  |
| 9   | C276-0251           |    | -7.3           | 6.43            | 8.92  |      | 3.11   |       |         | 4.83  |  |
| 10  | C276-0011           |    | -7.2           | 1.67            | 1.62  |      | 1.61   |       |         | 4.03  |  |
| 11  | $\alpha$ -lapachone |    | -7.1           | 6.85            | 2.22  |      | >100   |       |         | 4.84  |  |
| 12  | C276-1418           |   | -7.4           | >100            | >100  |      | >100   |       |         |       |  |
| 13  | D470-0404           |  | -7.4           | >100            | >100  |      | 43.1   |       |         |       |  |
| 14  | E851-1899           |  | -7.4           | >100            | >100  |      | 26.8   |       |         |       |  |
| 15  | F059-1250           |  | -7.4           | 28.2            | >100  |      | 40.9   |       |         |       |  |

(Continued)

| No. | Compounds | Chemical structure                                                                    | BAE (kcal/mol) | GI50 ( $\mu$ M) |       |      |        |      |         |       |  |
|-----|-----------|---------------------------------------------------------------------------------------|----------------|-----------------|-------|------|--------|------|---------|-------|--|
|     |           |                                                                                       |                | A549            | H1975 | H460 | BGC823 | MCF7 | BEL7402 | 16HBE |  |
| 16  | J005-0627 | 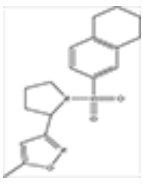   | -7.4           | >100            | 89.4  |      | >100   |      |         |       |  |
| 17  | C301-8636 |    | -7.3           | >100            | 39.1  |      | >100   |      |         |       |  |
| 18  | D398-0606 |    | -7.3           | >100            | >100  |      | >100   |      |         |       |  |
| 19  | G702-3319 |    | -7.3           | >100            | >100  |      | >100   |      |         |       |  |
| 20  | G702-0820 |    | -7.2           | >100            | >100  |      | >100   |      |         |       |  |
| 21  | K261-0992 |    | -7.2           | >100            | >100  |      | >100   |      |         |       |  |
| 22  | K261-0993 |  | -7.2           | >100            | >100  |      | >100   |      |         |       |  |
| 23  | 2360-0370 |  | -7.1           | 15.9            | >100  |      | 20.5   |      |         |       |  |
| 24  | 4607-1348 |  | -7.1           | >100            | >100  |      | >100   |      |         |       |  |

(Continued)

| No. | Compounds | Chemical structure                                                                  | BAE (kcal/mol) | GI50 ( $\mu$ M) |       |      |        |      |         |       |  |
|-----|-----------|-------------------------------------------------------------------------------------|----------------|-----------------|-------|------|--------|------|---------|-------|--|
|     |           |                                                                                     |                | A549            | H1975 | H460 | BGC823 | MCF7 | BEL7402 | 16HBE |  |
| 25  | D150-0115 | 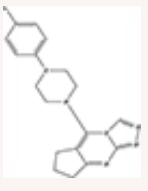 | -7.1           | >100            | >100  |      | >100   |      |         |       |  |
| 26  | D322-0003 |  | -7.1           | >100            | >100  |      | >100   |      |         |       |  |
| 27  | G702-0783 |  | -7.1           | >100            | >100  |      | >100   |      |         |       |  |
| 28  | K261-1745 |  | -7.1           | >100            | >100  |      | >100   |      |         |       |  |

**Supplementary Table S2: The relative Skp1 expression and GI50s of 6-OAP on the cell lines**

| Cell lines | Cell types                              | Skp1/Actin | GI50s |
|------------|-----------------------------------------|------------|-------|
| A549       | lung cancer                             | 1.23       | 2.86  |
| H1975      | lung cancer                             | 0.95       | 2.94  |
| H460       | lung cancer                             | 0.91       | 3.91  |
| H292       | lung cancer                             | 0.92       | 3.21  |
| 95D        | lung cancer                             | 1.25       | 3.00  |
| L78        | lung cancer                             | 1.53       | 3.63  |
| EKVX       | lung cancer                             | 1.13       | 2.29  |
| HOP-62     | lung cancer                             | 0.72       | 6.58  |
| U266       | myeloma                                 | 1.24       | 2.51  |
| SGC7901    | gastric cancer                          | 0.93       | 5.00  |
| BGC823     | gastric cancer                          | 0.90       | 4.33  |
| HepG2      | liver cancer                            | 0.95       | 9.31  |
| Bel7402    | liver cancer                            | 0.93       | 3.02  |
| MDA-MB-231 | breast cancer                           | 0.95       | 5.87  |
| MCF-7      | breast cancer                           | 0.87       | 3.23  |
| HeLa       | cervical cancer                         | 0.96       | 3.96  |
| HT29       | colon cancer                            | 1.52       | 2.72  |
| HCT116     | colon cancer                            | 1.42       | 2.44  |
| A375       | melanoma                                | 0.98       | 2.80  |
| K562       | leukemia                                | 1.05       | 3.66  |
| UO-31      | kidney cancer                           | 0.45       | 7.68  |
| HLF        | normal human embryonic lung fibroblasts | 0.88       | 4.90  |
| 16HBE      | normal human bronchial epithelial cells | 0.81       | 8.76  |
